# Supplementary material for: Personalising intravenous to oral antibiotic switch decision making through fair interpretable machine learning
Source: PubMed Central journal article supplement (PMC10787786; doi:10.1038/s41467-024-44740-2), 2024-01-13
Supplement: 41467_2024_44740_MOESM1_ESM.pdf [file 41467_2024_44740_MOESM1_ESM.pdf]

# Supplementary Material

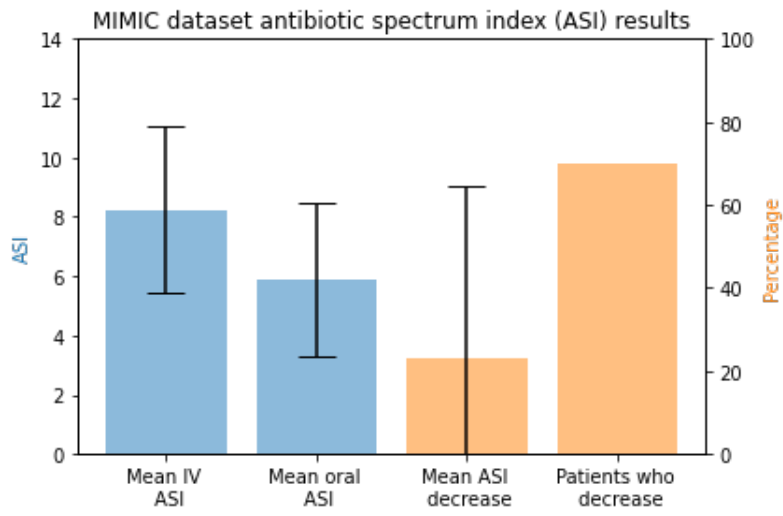

Figure 1: MIMIC antibiotic spectrum index results for the day before switching (IV) and the day after switching (oral). Error bars indicate the standard deviation.

ASI;Antibiotic spectrum index

Table 1: Feature sets identified by the genetic algorithm. The first 5 were used within the short model while all the features were used in the long model. The short feature set contained the 1st, 2nd, 4th, 5th and 6th SHAP ranked features, while the long feature set contained those same 5 alongside an additional 32. Details of the Catch22 transformation key can be found in Supplementary Table. 2.

| Clinical parameter          | Catch22 transformation key | Calculated over the entire current stay or the given day | Calculated as the difference from the previous day | SHAP value |
|-----------------------------|----------------------------|----------------------------------------------------------|----------------------------------------------------|------------|
| Systolic blood pressure     | 17                         | Entire current stay                                      | ×                                                  | 2.27       |
| Heart rate                  | 17                         | Given day                                                | ×                                                  | 2.05       |
| Mean blood pressure         | 11                         | Entire current stay                                      | ×                                                  | 1.62       |
| O2 saturation pulseoxymetry | 3                          | Entire current stay                                      | ×                                                  | 1.38       |
| GCS motor response          | 15                         | Entire current stay                                      | ×                                                  | 1.37       |
| Heart rate                  | 17                         | Entire current stay                                      | ×                                                  | 1.27       |
| GCS verbal response         | 10                         | Entire current stay                                      | ×                                                  | 1.16       |
| Heart rate                  | 14                         | Given day                                                | ×                                                  | 1.15       |
| O2 saturation pulseoxymetry | 17                         | Given day                                                | ×                                                  | 1.06       |
| GCS motor response          | 10                         | Entire current stay                                      | ×                                                  | 0.98       |
| Respiratory rate            | 17                         | Entire current stay                                      | ×                                                  | 0.92       |
| Mean blood pressure         | 5                          | Entire current stay                                      | ×                                                  | 0.91       |
| Respiratory rate            | 6                          | Entire current stay                                      | ✓                                                  | 0.80       |
| Temperature                 | 7                          | Entire current stay                                      | ✓                                                  | 0.77       |
| Systolic blood pressure     | 15                         | Entire current stay                                      | ×                                                  | 0.77       |
| Heart rate                  | 9                          | Entire current stay                                      | ✓                                                  | 0.77       |
| Systolic blood pressure     | 5                          | Entire current stay                                      | ✓                                                  | 0.75       |
| Heart rate                  | 3                          | Given day                                                | ×                                                  | 0.73       |
| O2 saturation pulseoxymetry | 9                          | Given day                                                | ×                                                  | 0.72       |
| O2 saturation pulseoxymetry | 2                          | Given day                                                | ×                                                  | 0.69       |
| GCS motor response          | 23                         | Entire current stay                                      | ×                                                  | 0.69       |
| GCS verbal response         | 7                          | Entire current stay                                      | ×                                                  | 0.68       |
| GCS motor response          | 13                         | Given day                                                | ×                                                  | 0.63       |
| Heart rate                  | 16                         | Entire current stay                                      | ×                                                  | 0.63       |
| GCS motor response          | 0                          | Entire current stay                                      | ×                                                  | 0.62       |
| Temperature                 | 10                         | Given day                                                | ✓                                                  | 0.61       |
| Heart rate                  | 21                         | Given day                                                | ×                                                  | 0.61       |
| GCS motor response          | 22                         | Given day                                                | ×                                                  | 0.58       |
| Diastolic blood pressure    | 3                          | Entire current stay                                      | ×                                                  | 0.56       |
| GCS eye opening             | 21                         | Given day                                                | ×                                                  | 0.55       |
| Respiratory rate            | 12                         | Given day                                                | ✓                                                  | 0.55       |
| GCS motor response          | 8                          | Entire current stay                                      | ×                                                  | 0.52       |
| O2 saturation pulseoxymetry | 1                          | Entire current stay                                      | ✓                                                  | 0.52       |
| Temperature                 | 7                          | Entire current stay                                      | ×                                                  | 0.52       |
| Temperature                 | 6                          | Entire current stay                                      | ✓                                                  | 0.51       |
| Respiratory rate            | 3                          | Given day                                                | ×                                                  | 0.51       |
| Heart rate                  | 8                          | Given day                                                | ×                                                  | 0.50       |

SHAP;SHapley Additive exPlanations, GCS;Glasgow Coma Scale

Table 2: Catch22 time-series transformation key. Note that the mean and standard deviation were also included. More information on these transformations can be found at <https://feature-based-time-series-analys.gitbook.io/catch22-features/>.

| Key | Corresponding transformation                |
|-----|---------------------------------------------|
| 0   | DN_HistogramMode_5                          |
| 1   | DN_HistogramMode_10                         |
| 2   | CO_flecac                                   |
| 3   | CO_FirstMin_ac                              |
| 4   | CO_HistogramAMLeven_2.5                     |
| 5   | CO_trev_1_num                               |
| 6   | MD_hrv_classic_pnn40                        |
| 7   | SB_BinaryStats_mean_longstretch1            |
| 8   | SB_TransitionMatrix_3ac_sumdiagcov          |
| 9   | PD_PeriodicityWang_th0.01                   |
| 10  | CO_Embed2_Dist_tau_d_expfit_meandiff        |
| 11  | IN_AutoMutualInfoStats_40_gaussian_fmmi     |
| 12  | FC_LocalSimple_mean1_taresrat               |
| 13  | DN_OutlierInclude_p_001_mdrmd               |
| 14  | DN_OutlierInclude_n_001_mdrmd               |
| 15  | SP_Summaries_welch_rect_area_5.1            |
| 16  | SB_BinaryStats_diff_longstretch0            |
| 17  | SB_MotifThree_quantile_hh                   |
| 18  | SC_FluctAnal_2_rsrangefit_50.1_logi_prop_r1 |
| 19  | SC_FluctAnal_2_dfa_50.1.2_logi_prop_r1      |
| 20  | SP_Summaries_welch_rect_centroid            |
| 21  | FC_LocalSimple_mean3_stderr                 |
| 22  | Mean                                        |
| 23  | Standard deviation                          |

Table 3: Models hyperparameters and optimisation options.

| Hyperparameter          | Short model | Long model  | Optimisation options                     |
|-------------------------|-------------|-------------|------------------------------------------|
| Learning rate           | 0.001       | 0.001       | 0.1, 0.01, 0.001, 0.0001, 0.00001        |
| Batch size              | 256         | 256         | 16, 32, 64, 128, 256, 512                |
| Optimiser               | Adam        | Adam        | Adam, RMSprop, SGD                       |
| Input dimension         | 5           | 37          | -                                        |
| Batch normalization     | BatchNorm1d | BatchNorm1d | -                                        |
| Number of hidden layers | 2           | 3           | 1, 2, 3, 4, 5, 6, 7, 8, 9                |
| Hidden dimension 1      | 512         | 64          | 2, 4, 8, 16, 32, 64, 128, 256, 512, 1024 |
| Hidden dimension 2      | 16          | 512         | 2, 4, 8, 16, 32, 64, 128, 256, 512, 1024 |
| Hidden dimension 3      | -           | 256         | 2, 4, 8, 16, 32, 64, 128, 256, 512, 1024 |
| Output dimension        | 1           | 1           | -                                        |
| Activation function     | ReLU        | ReLU        | -                                        |
| Dropout                 | 0.4         | 0.5         | 0, 0.1, 0.2, 0.3, 0.4, 0.5               |

SGD;Stochastic gradient descent, ReLU;Rectified linear unit

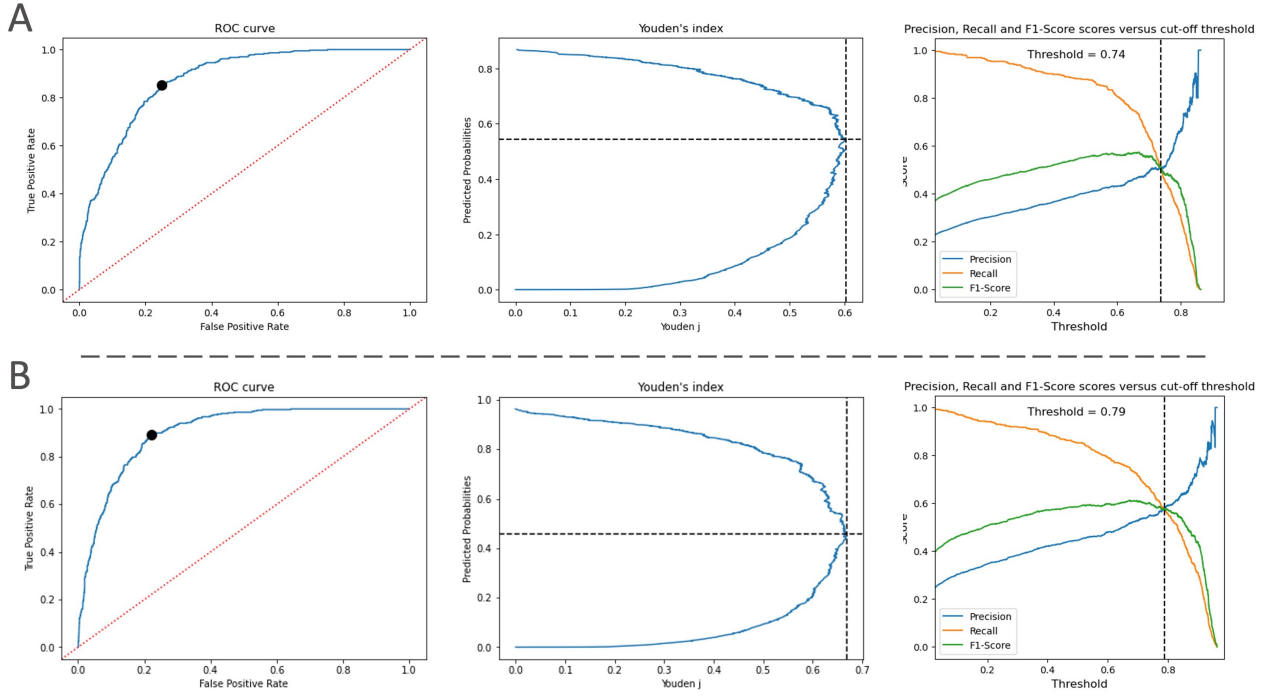

Figure 2: Preprocessing threshold optimisation graphs. ROC curve, Youden's index and Precision, Recall and F1-Score plots for the short model [A] (1st and 2nd threshold of 0.54 and 0.74 respectively) and the long model [B] (1st and 2nd threshold of 0.52 and 0.79 respectively).

ROC;Receiver operating characteristic

Table 4: Patient mean mortality by switch event temporal difference.

|                                                                     | Model     | Short |      | Long |      |
|---------------------------------------------------------------------|-----------|-------|------|------|------|
|                                                                     | Threshold | 1st   | 2nd  | 1st  | 2nd  |
| Number of days<br>between the real<br>and predicted<br>switch event | -7        | 0.00  | 0.00 | 0.00 | 0.00 |
|                                                                     | -6        | 0.50  | 0.00 | 0.00 | 0.00 |
|                                                                     | -5        | 0.00  | 0.50 | 0.40 | 0.00 |
|                                                                     | -4        | 0.17  | 0.00 | 0.00 | 0.33 |
|                                                                     | -3        | 0.43  | 0.17 | 0.00 | 0.00 |
|                                                                     | -2        | 0.11  | 0.38 | 0.09 | 0.17 |
|                                                                     | -1        | 0.04  | 0.29 | 0.00 | 0.00 |
|                                                                     | 0         | 0.07  | 0.00 | 0.05 | 0.02 |
|                                                                     | 1         | 0.00  | 0.00 | 0.00 | 0.05 |
|                                                                     | 2         | 0.00  | 0.10 | 0.00 | 0.00 |
|                                                                     | 3         | 0.00  | 0.00 | 0.00 | 0.00 |
|                                                                     | 4         | 0.00  | 0.00 | 0.00 | 0.00 |
| 5                                                                   | 0.00      | 0.00  | 0.00 | 0.00 |      |

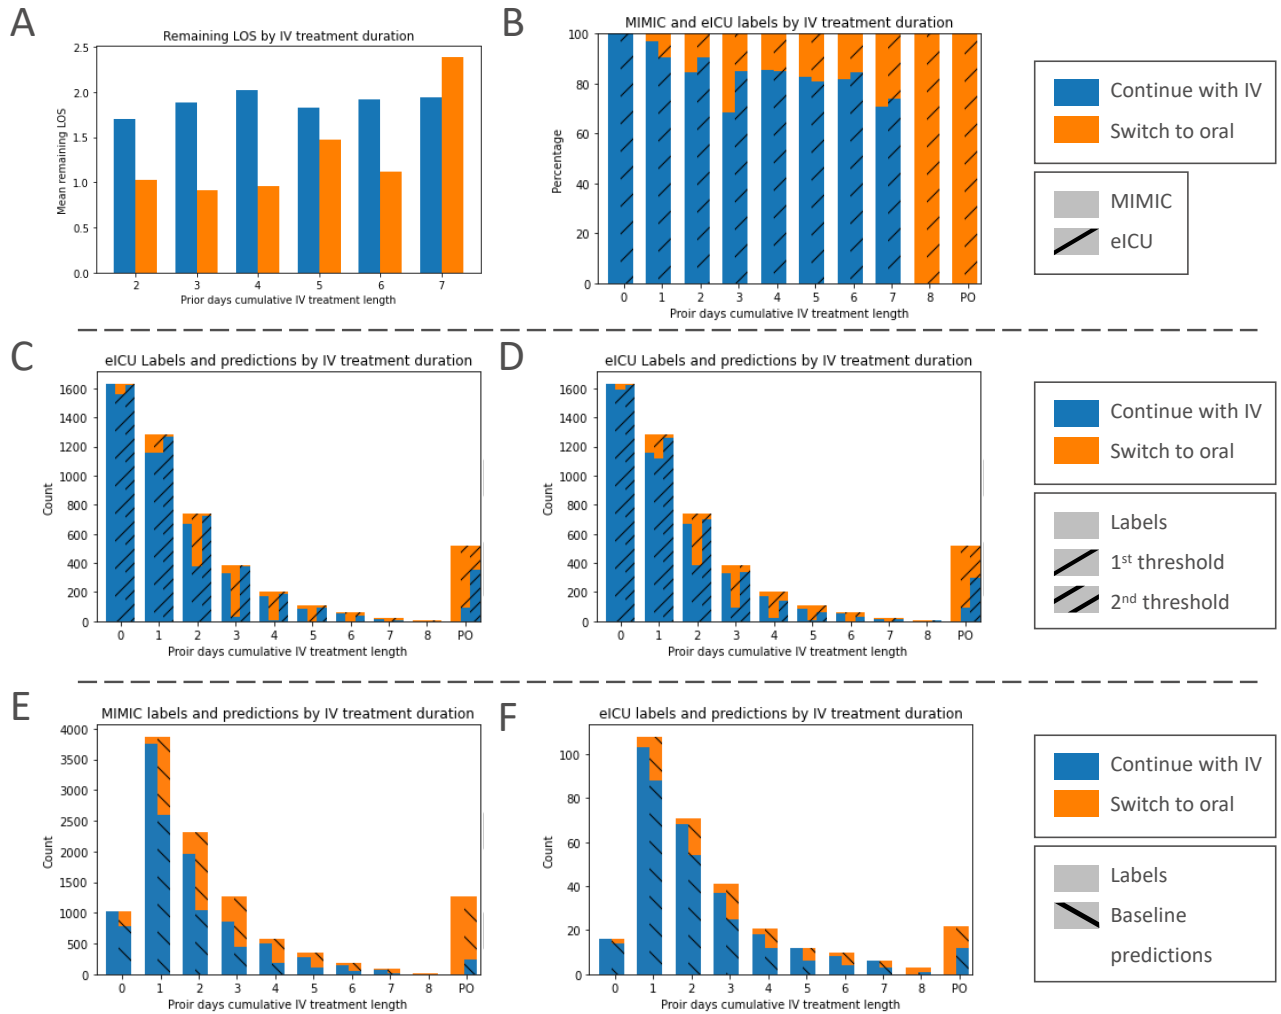

Figure 3: Labels, predictions, and LOS broken down by IV treatment duration. [A] demonstrates those patients on oral therapies on average have a shorter remaining LOS than those on IV. [B] shows switch labels for both the MIMIC and eICU datasets. They are generally consistent although eICU sees less patients switch on day 3. [C] and [D] are predictions for the transfer learning short and long models respectively on the eICU dataset. Models predict many more patients should not switch when compared to MIMIC results (Figure. 2). [E] and [F] show how baseline predictions compare to the labels for both MIMIC and eICU.

MIMIC;Medical Information Mart for Intensive Care, ICU;Intensive care unit, IV;Intravenous, LOS;Length of stay

Table 5: Threshold optimisation fairness results for the short model.

| Sensitive attribute | Group    | Original results |      |      |    | Threshold optimisation results |      |      |    |
|---------------------|----------|------------------|------|------|----|--------------------------------|------|------|----|
|                     |          | AUROC            | TPR  | FPR  | EO | AUROC                          | TPR  | FPR  | EO |
| Age                 | 20       | 0.73             | 0.74 | 0.27 | ✓  | 0.63                           | 0.86 | 0.61 | ✗  |
|                     | 30       | 0.80             | 0.86 | 0.26 | ✓  | 0.72                           | 0.73 | 0.28 | ✓  |
|                     | 40       | 0.78             | 0.81 | 0.25 | ✓  | 0.76                           | 0.82 | 0.31 | ✓  |
|                     | 50       | 0.76             | 0.78 | 0.25 | ✓  | 0.81                           | 0.86 | 0.25 | ✓  |
|                     | 60       | 0.79             | 0.82 | 0.23 | ✓  | 0.79                           | 0.87 | 0.29 | ✓  |
|                     | 70       | 0.73             | 0.69 | 0.23 | ✓  | 0.78                           | 0.87 | 0.31 | ✓  |
|                     | 80       | 0.77             | 0.81 | 0.26 | ✓  | 0.80                           | 0.87 | 0.26 | ✓  |
|                     | 90       | 0.78             | 0.79 | 0.23 | ✗  | 0.78                           | 0.86 | 0.3  | ✓  |
| Race                | Asian    | 0.79             | 0.83 | 0.24 | ✓  | 0.71                           | 0.81 | 0.38 | ✓  |
|                     | Black    | 0.78             | 0.83 | 0.27 | ✓  | 0.79                           | 0.86 | 0.28 | ✓  |
|                     | Hispanic | 0.80             | 0.85 | 0.25 | ✓  | 0.76                           | 0.84 | 0.31 | ✓  |
|                     | Native   | 0.78             | 0.97 | 0.43 | ✗  | 0.75                           | 0.93 | 0.43 | ✗  |
|                     | Other    | 0.76             | 0.72 | 0.19 | ✓  | 0.78                           | 0.84 | 0.29 | ✓  |
|                     | Unknown  | 0.79             | 0.83 | 0.25 | ✓  | 0.81                           | 0.86 | 0.23 | ✓  |
|                     | White    | 0.77             | 0.79 | 0.24 | ✓  | 0.78                           | 0.87 | 0.31 | ✓  |
| Insurance           | Medicaid | 0.72             | 0.69 | 0.26 | ✗  | 0.74                           | 0.82 | 0.34 | ✓  |
|                     | Medicare | 0.78             | 0.81 | 0.25 | ✓  | 0.77                           | 0.88 | 0.33 | ✓  |
|                     | Other    | 0.78             | 0.80 | 0.24 | ✓  | 0.79                           | 0.9  | 0.33 | ✓  |

AUROC;Area under the receiver operating characteristic, TPR;True positive rate, FPR;False positive rate, EO;Equalised odds

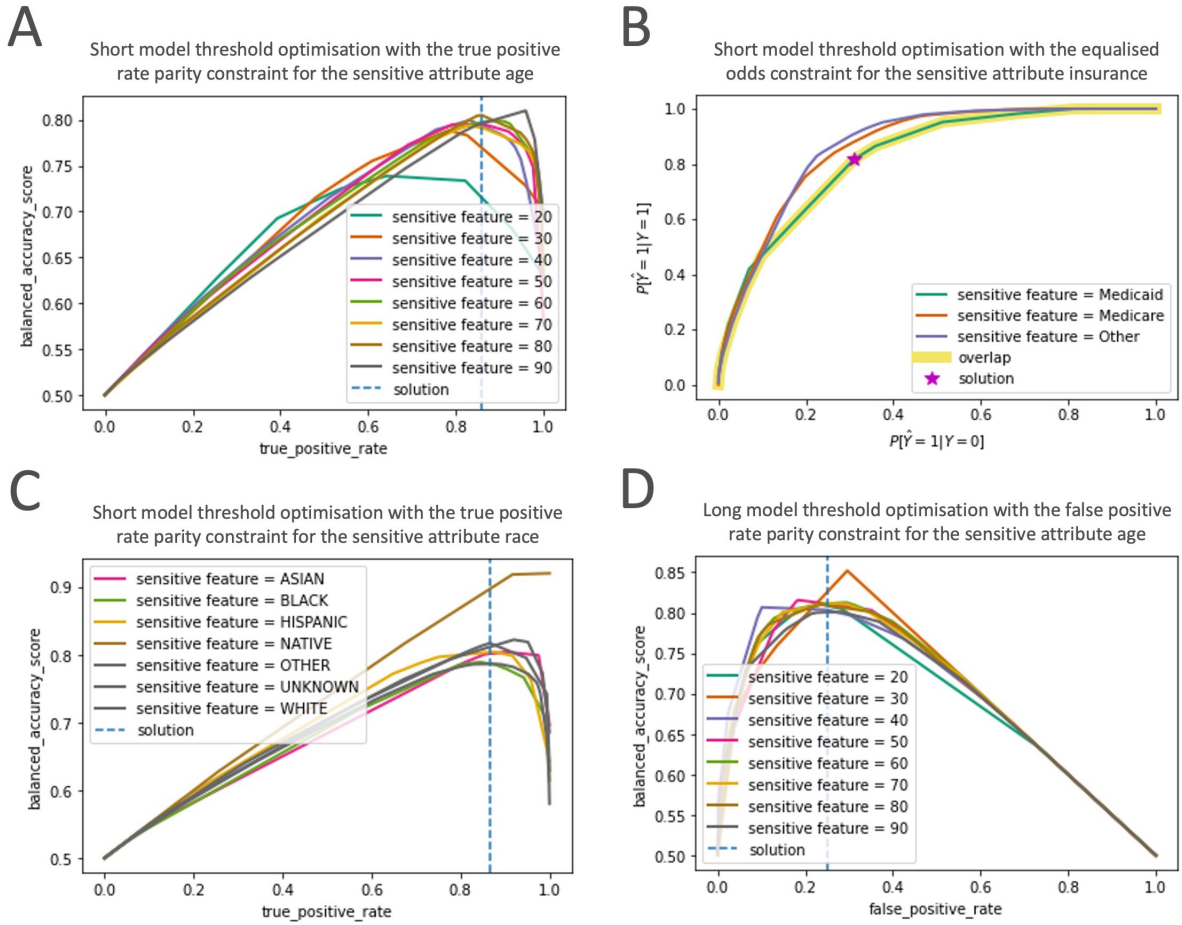

Figure 4: Sensitive attribute threshold optimisation graphs. [A] indicates that while fairness is now achieved by the short model for the 30 year old age group, 20 year old’s suffer (Supplementary Table. 5). [B] demonstrates fair performance by the short model across insurance groups. [C] shows equalised odds cannot be achieved by the short model for the native population. [D] exhibits fair performance by the long model across age groups.

Table 6: Threshold optimisation fairness results for the long model.

| Sensitive attribute | Group | Original results |      |      |    | Threshold optimisation results |      |      |    |
|---------------------|-------|------------------|------|------|----|--------------------------------|------|------|----|
|                     |       | AUROC            | TPR  | FPR  | EO | AUROC                          | TPR  | FPR  | EO |
| Age                 | 20    | 0.76             | 0.77 | 0.24 | ✓  | 0.69                           | 0.63 | 0.24 | ✗  |
|                     | 30    | 0.74             | 0.64 | 0.20 | ✗  | 0.78                           | 0.88 | 0.31 | ✓  |
|                     | 40    | 0.77             | 0.8  | 0.26 | ✓  | 0.76                           | 0.76 | 0.23 | ✓  |
|                     | 50    | 0.8              | 0.87 | 0.26 | ✓  | 0.81                           | 0.88 | 0.25 | ✓  |
|                     | 60    | 0.8              | 0.84 | 0.24 | ✓  | 0.81                           | 0.86 | 0.24 | ✓  |
|                     | 70    | 0.81             | 0.86 | 0.23 | ✓  | 0.81                           | 0.88 | 0.25 | ✓  |
|                     | 80    | 0.81             | 0.85 | 0.23 | ✓  | 0.82                           | 0.89 | 0.25 | ✓  |
|                     | 90    | 0.78             | 0.78 | 0.22 | ✓  | 0.78                           | 0.81 | 0.25 | ✓  |

AUROC;Area under the receiver operating characteristic, TPR;True positive rate, FPR;False positive rate, EO;Equalised odds

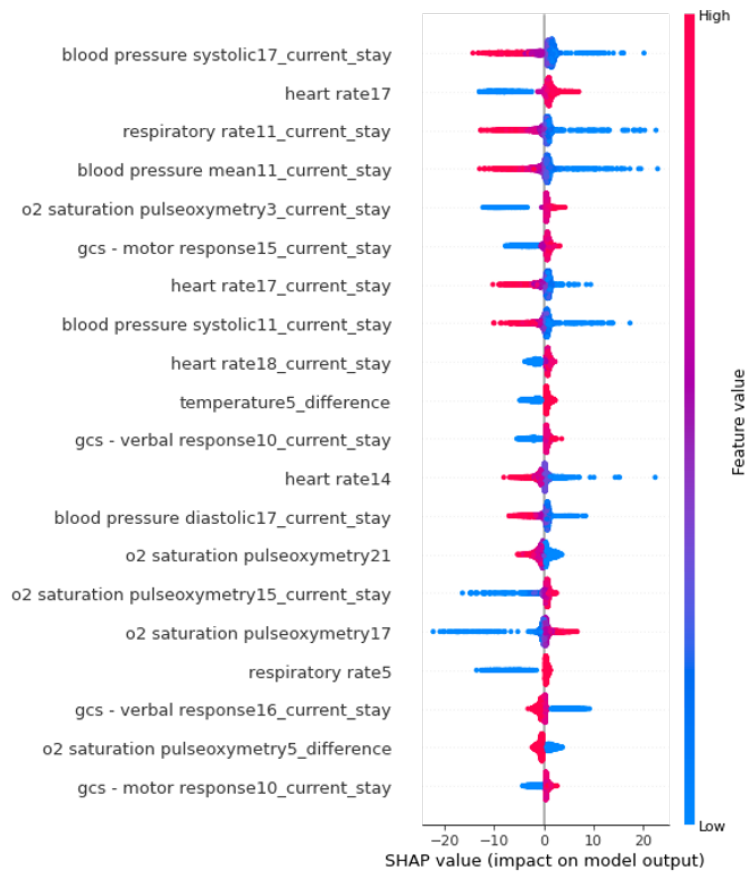

Figure 5: SHAP and feature value distribution for the 20 most important features. Notice how ‘respiratory rate11\_current\_stay’ and ‘blood pressure mean11\_current\_stay’ (features of importance 3 and 4 respectively) are very similar implying redundancy.

SHAP;SHapley Additive exPlanations

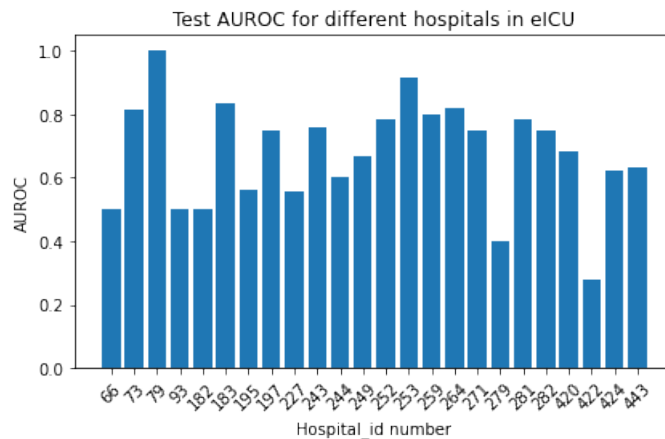

Figure 6: eICU test results broken down by hospitals.

ICU;Intensive care unit, AUROC;Area under the receiver operating characteristic



Table 7: Antibiotics selected for incomplete oral absorption analysis. \* Selected due to nonlinear absorption.

| Antibiotic     | Oral bioavailability (%) |
|----------------|--------------------------|
| Amoxicillin    | 70                       |
| Ampicillin     | 50                       |
| Augmentin      | 70                       |
| Azithromycin   | 37                       |
| Cefpodoxime    | 50                       |
| Ciprofloxacin  | 70                       |
| Clarithromycin | 50                       |
| Clindamycin*   | 90                       |
| DiCLOXacillin  | 49                       |
| Erythromycin   | 32                       |
| Flucloxacillin | 50                       |
| Neomycin       | 3                        |
| Nitrofurantoin | 80                       |
| Penicillin     | 60                       |
| Tetracycline   | 60                       |
